# Supplementary material for: Stochastic Simulations on the Reliability of Action Potential Propagation in Thin Axons
Source: PLOS journal article supplement (doi:10.1371/journal.pcbi.0030079), 2007-05-01
Supplement: S1 (10.1371/journal.pcbi.0030079.s001) [file journal.pcbi.0030079.s001]

| Parameter | Jitter SD | SAP | Stoch. -saltation |
| --- | --- | --- | --- |
|  |  | *noise* | *noise* |
|  | +47% | y | y |
|  | +23% | y | y |
|  | +22% | y | y |
|  | +19% | y | y |
|  | -14% | y | y |
|  | +19% | y | y |
|  | -38% | y | y |

Table S1: Parameter variation in a 0.3 m diameter squid axon of 10mm length. Effects of varying Na and K channel densities (,), as well as varying axoplasmic resistance () by 50% from standard parameter values in Tab. SS1. The table lists spike time jitter and the occurrence of stochastic APs (SAP) and stochastic micro-saltatory conduction effects, which occurred for all parameters. The term *noise* refers to the break down of communication on the axon, being so noisy, such that no specific AP could be discerned.
