# Supplementary material for: Stochastic Simulations on the Reliability of Action Potential Propagation in Thin Axons
Source: PLOS journal article supplement (doi:10.1371/journal.pcbi.0030079), 2007-05-01
Supplement: S4 (10.1371/journal.pcbi.0030079.s004) [file journal.pcbi.0030079.s004]

| Parameter | Value | Unit | Source |
| --- | --- | --- | --- |
| Membrane |  | | |
|  | 1 |  | [Error: Reference source not found] |
|  | 3333 |  | [Error: Reference source not found] |
|  | 35.4 |  *cm* | [Error: Reference source not found] |
|  | 0 | mV | [Error: Reference source not found] |
|  | 0.3 |  | see [Error: Reference source not found] |
|  | 10.613 | mV | [Error: Reference source not found] |
| Na current (i) |  |  | see [Error: Reference source not found, Error: Reference source not found] or Patlak model Eq.1-Eq.6 |
|  | 120 |  | [Error: Reference source not found] |
|  | 60 |  | see [Error: Reference source not found] |
|  | 20 | pS | [Error: Reference source not found] |
|  | 115 | mV | [Error: Reference source not found] |
|  | 6.3 | C | [Error: Reference source not found] |
|  | 3 |  | [Error: Reference source not found] |
|  | 3 |  | [Error: Reference source not found] |
| K current (i) |  |  | see [Error: Reference source not found, Error: Reference source not found] |
|  | 36 |  | [Error: Reference source not found] |
|  | 18 |  | see [Error: Reference source not found] |
|  | 20 | pS | [Error: Reference source not found] |
|  | -12 | mV | [Error: Reference source not found] |
|  | 6.3 | C | [Error: Reference source not found] |
|  | 3 |  | [Error: Reference source not found] |

Table S4: Full parameter set for the squid axon model used in the second protocol. See main text for details.
