# Supplementary material for: Stochastic Simulations on the Reliability of Action Potential Propagation in Thin Axons
Source: PLOS journal article supplement (doi:10.1371/journal.pcbi.0030079), 2007-05-01
Supplement: S6 (10.1371/journal.pcbi.0030079.s006) [file journal.pcbi.0030079.s006]

| Kinetic function |  | *z* | *d* |  |
| --- | --- | --- | --- | --- |
|  | -19.0 | 2.45 | 0.6 |  |
|  | -22.35 | 2.45 | 0.6 |  |
|  | -26.5 | 0.3 | 0.5 |  |
|  | -22.4 | 0.3 | 0.5 |  |
|  | -21.0 | 2.45 | 0.55 |  |
|  | -28.05 | 2.45 | 0.55 |  |
| (*v*) | -19.0 | 2.45 | 0.6 | -1.8 |
| (*v*) | -23.9 | 2.45 | 0.6 | -1.8 |
| (*v*) | -21.32 | 2.45 | 0.6 | -1.8 |
| (*v*) | -27.08 | 2.45 | 0.6 | -1.8 |

Table S6: Parameter values for the kinetic functions of the [Error: Reference source not found] Na channel model.
