# Supplementary figures and images for: Stochastic Simulations on the Reliability of Action Potential Propagation in Thin Axons
Source: PLOS journal article supplement (doi:10.1371/journal.pcbi.0030079), 2007-05-01

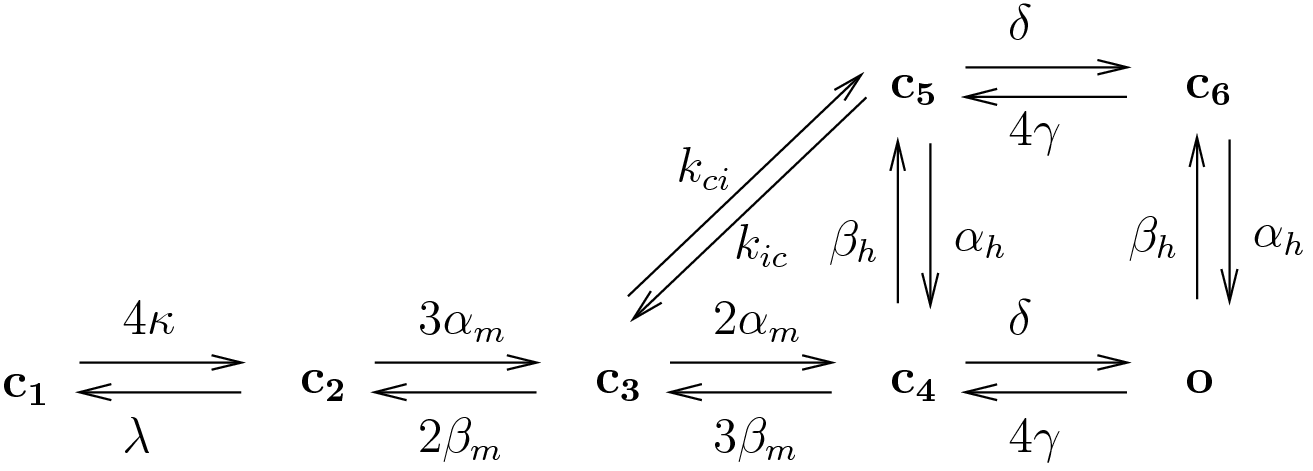


Figure S1: Markov state transition scheme of the Patlak Na channel model.

Supplement: S1 (10.1371/journal.pcbi.0030079.s001) [file journal.pcbi.0030079.s001]
